# An atlas of transcription factors expressed in the *Drosophila melanogaster* pupal terminalia

Ben J. Vincent<sup>1\*</sup>, Gavin R. Rice<sup>1\*</sup>, Gabriella M. Wong<sup>1</sup>, William J. Glassford<sup>1,3</sup>, Kayla I. Downs<sup>1</sup>, Jessica L. Shastay<sup>1</sup>, Kenechukwu Charles-Obi<sup>1</sup>, Malini Natarajan<sup>2,4</sup>, Madelaine Gogol<sup>2</sup>, Julia Zeitlinger<sup>2,5</sup>, and Mark Rebeiz<sup>1‡</sup>

<sup>1</sup> Department of Biological Sciences, University of Pittsburgh, Pittsburgh, Pennsylvania, USA

<sup>2</sup> Stowers Institute for Medical Research, Kansas City, Missouri, USA

<sup>3</sup> Current address: Mortimer B. Zuckerman Mind Brain Behavior Institute, Columbia University, New York, New York, USA

<sup>4</sup> Current address: Department of Molecular Biology, Cell Biology, and Biochemistry, Brown University, Providence, Rhode Island, USA

<sup>5</sup> Department of Pathology and Laboratory Medicine, Kansas University Medical Center, Kansas City, Kansas, USA

\* these authors contributed equally to this work

‡ corresponding author ([rebeiz@pitt.edu](mailto:rebeiz@pitt.edu))

Key words: gene regulation, development, morphogenesis, *Drosophila*, genitalia, terminalia

## Abstract

During development, transcription factors and signaling molecules govern gene regulatory networks to direct the formation of unique morphologies. As changes in gene regulatory networks are often implicated in morphological evolution, mapping transcription factor landscapes is important, especially in tissues that undergo rapid evolutionary change. The terminalia (genital and anal structures) of *Drosophila melanogaster* and its close relatives exhibit dramatic changes in morphology between species. While previous studies have found network components important for patterning the larval genital disc, the networks governing adult structures during pupal development have remained uncharted. Here, we performed RNA-seq in whole *Drosophila melanogaster* terminalia followed by *in situ* hybridization for 100 highly expressed transcription factors during pupal development. We find that the terminalia is highly patterned during pupal stages and that specific transcription factors mark separate structures and substructures. Our results are housed online in a searchable database (flygenitalia.pitt.edu) where they can serve as a resource for the community. This work lays a foundation for future investigations into the gene regulatory networks governing the development and evolution of *Drosophila* terminalia.

# Introduction

As animal development proceeds, transcription factors and signaling molecules are expressed in precise patterns to specify cell fate in space and time (Levine and Davidson 2005). These genes ultimately impinge upon cellular effectors, forming gene regulatory networks that alter cellular behavior and generate complex morphologies (Smith *et al.* 2018). Changes within gene regulatory networks can have cellular consequences and result in morphological differences between species (Rebeiz *et al.* 2015). To understand how body parts are built during development and modified through evolution, we must define and dissect their relevant gene regulatory networks.

Of all the anatomical parts in the animal body plan, genitalia have been of particular interest for many evolutionary questions. Genital morphology diverges rapidly between species, which has led some to theorize that males and females are locked in an arms race such that changes in shape or size of genital structures can give one sex a reproductive advantage (Hosken and Stockley 2004; Brennan and Prum 2015) while others theorize that cryptic female choice has led to these morphological differences (Eberhard 1985; Simmons 2014). The accumulation of divergent morphologies between species may then lead to miscoupling of genitalia during interbreeding, reducing viability or fecundity (Masly 2011; Yassin and David 2016; Tanaka *et al.* 2018). Genital morphology is also critical for taxonomic classification, as it is often the only way to reliably distinguish closely related species (Okada 1954; Bock, I.R. & Wheeler, M.R. 1972; Kamimura and Mitsumoto 2011). Previous studies have highlighted several novel genital morphologies that may provide key insights into how new traits evolve (Kopp and True 2002; Yassin and Orgogozo 2013). Despite their intensive study, the molecular basis of genital evolution remains still poorly understood.

The genitalia of *Drosophila melanogaster* and its close relatives provide a unique opportunity to determine how gene regulatory networks build complex and evolving structures. Most previous work on genital development has focused on the larval genital disc, where transcriptomics and targeted genetic experiments have identified several genes that alter adult genitalia when perturbed (Chen and Baker 1997; Gorfinkiel *et al.* 1999; Keisman and Baker 2001; Chatterjee *et al.* 2011). However, much less is known about the genes that control genital development during metamorphosis, when many of the adult structures form through epithelial remodeling (Glassford *et al.* 2015). Quantitative trait locus (QTL) mapping studies have also been performed in *Drosophila*, which have identified several large genomic regions that contribute to genital diversification between crossable sister species (Macdonald and Goldstein 1999; Zeng *et al.* 2000; Masly *et al.* 2011; McNeil *et al.* 2011; Tanaka *et al.* 2015; Takahara and Takahashi 2015). An examination of the gene regulatory networks which govern development of these structures during pupal stages may yield insights into the developmental partitioning of a complex tissue, the causative genes that underlie morphological differences between species, and the origins of novel traits.

The adult male terminalia (comprising both the genitalia and analia) of *D. melanogaster* are subdivided into five main structures, following recently revised nomenclature (Rice *et al.* 2019b): the hypandrium, phallus, surstylus (clasper), epandrial ventral lobe (EVL, also known as the lateral plate), and cercus (also known as the anal plate) (Figure 1A). By 28 hours after puparium formation (APF), four structures can be distinguished in the developing terminalia:

hypandrium, phallus, cercus, and the tissue which will give rise to the EVL and surstylus (Figure 1B). By 48 hours APF, the pupal terminalia effectively prefigure adult structures – the surstylus and EVL have separated, and the epandrial posterior lobe has formed along with many other substructures associated with the hypandrium and phallus (Figure 1B). Therefore, in less than 1 day, the pupal terminalia undergo a dramatic remodeling process that builds many adult structures. This rapid transformation motivated our search for transcription factors that pattern these structures during pupal development.

In this study, we performed RNA-seq of male terminalia during early pupal development and identified highly expressed transcription factors that may operate during this stage. We then used *in situ* hybridization to build a gene expression atlas of 100 transcription factors in the male pupal terminalia at two time points during development. Most of these genes were highly patterned, especially during the late time point, and we identified genetic markers for many structures and substructures that exhibit morphological differences between *Drosophilids*. Our data are housed in a searchable online database ([flygenitalia.biology.pitt.edu](http://flygenitalia.biology.pitt.edu)) that will expand as new expression patterns are charted. We believe that the transcription factors characterized here draw the outlines of gene regulatory networks that control genital development and evolution in *Drosophila*.

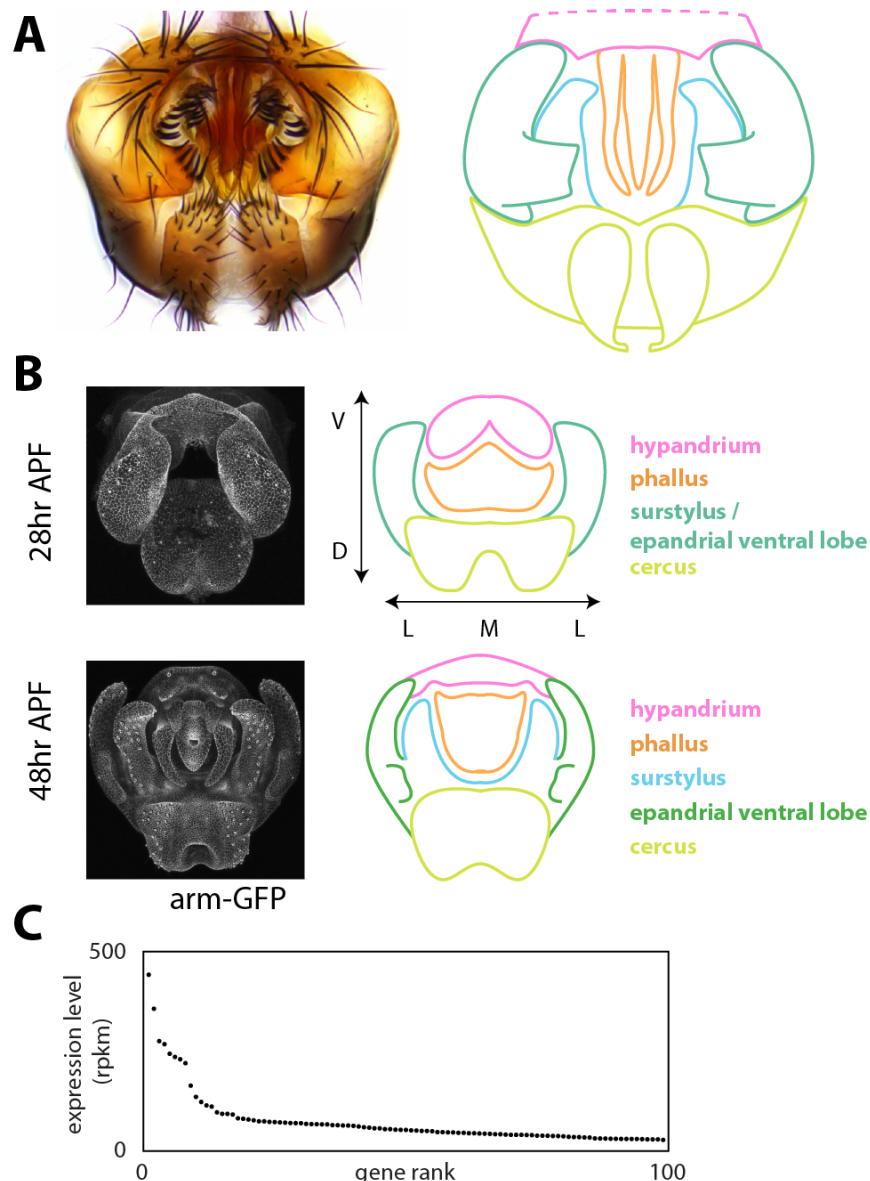

**Figure 1: Overview of male terminalia in *Drosophila melanogaster*.** A) Left: light microscopy image of adult male terminalia. Right: schematic of major terminal structures. Pink: hypandrium; orange: phallus; green: epandrial ventral lobe; cyan: surstylus; yellow: cercus. The hypandrium extends beyond the cartoon, as represented by dotted lines. Note that our annotations of the cercus includes epandrial dorsal lobe (EDL) and subepandrial sclerite; these are difficult to distinguish during development and thus have been collapsed under the umbrella of cercus structures. B) Left: confocal microscopy images of developing male terminalia at two developmental time points in a transgenic line where apical cell junctions are fluorescently labeled using an *armadillo-GFP* fusion transgene. Right: schematic of major terminal structures in development, color coded as above. Dorsal-ventral (D-V), and medio-lateral (M-L) axes are labeled. The anterior axis projects into the page while the posterior axis projects out of the page. C) Expression levels of the 100 most highly-expressed transcription factors at 28 hours after puparium formation (APF).

# Materials and Methods

Detailed, formatted protocols for probe design and synthesis, sample collection, dissection and fixation, and *in situ* hybridization can be found at [flygenitalia.biology.pitt.edu](http://flygenitalia.biology.pitt.edu).

## **RNA-seq and transcriptomic analysis**

RNA was isolated from single pupal terminal samples dissected at 24 hours APF or 28 hours APF using the Maxwell® 16 Tissue DNA Purification Kit (Promega). Poly-A RNA-seq libraries were generated using a Clontech library preparation kit (040215). Individual libraries from four different samples were generated for each time point, and libraries were sequenced on an Illumina HiSeq 2500. Sequencing reads from 3 lanes of 51-base Hi-seq data were aligned with tophat (2.0.13) to the dm3 assembly (Trapnell *et al.* 2009), which was retrieved from the UCSC Genome Browser with annotations from Flybase ([ftp://ftp.flybase.net/genomes/Drosophila\\_melanogaster/dmel\\_r5.57\\_FB2014\\_03/gff/](ftp://ftp.flybase.net/genomes/Drosophila_melanogaster/dmel_r5.57_FB2014_03/gff/)). Reads were counted in unioned exons using bedtools count (Quinlan and Hall 2010). Genes expressed in the terminalia were compared to the FlyTF.org list of annotated transcription factors (Pfreundt *et al.* 2010).

## **Probe design and synthesis**

Templates for 200-300 basepair RNA probes were designed from a large exon present in all annotated isoforms of each examined gene. Exons were chosen by retrieving the decorated FASTA from flybase.org, and annotated isoforms were examined using the UCSC genome browser. After exon selection, Primer3Plus was used to design PCR primers that would amplify a 200-300 base pair region, and 5-10 candidate primer pairs were screened using the UCSC In Silico PCR tool to identify sets that will amplify the region of interest from the most diverged Drosophilid species possible. This screening process was implemented to maximize the utility of any particular primer set for other species. Reverse primers were designed beginning with a T7 RNA polymerase binding sequence (TAATACGACTCACTATAG), and template DNA was PCR amplified from adult fly genomic DNA extracted using the DNeasy kit (QIAGEN). Digoxigenin-labeled probes were then synthesized using *in vitro* transcription (T7 RNA Polymerase, Promega / Life Technologies), ethanol precipitated, and resuspended in water for Nanodrop analysis. Probes were stored at -20°C in 50% formamide prior to *in situ* hybridization.

## **Sample collection, dissection and fixation**

Male *D. melanogaster* white pre-pupa (genotype: *yw*;+;+) were collected at room temperature and incubated in a petri dish containing a moistened Kimwipe at 25°C for 28 hours or 48 hours prior to dissection. After incubation, pupae were impaled in their anterior region and immobilized within a glass dissecting well containing cold phosphate buffered saline (PBS). The posterior tip of the pupa (20-40% of pupal length) was separated and washed with a P200 pipette to flush the pupal terminalia into solution. Samples were then collected in PBS with 0.1% Triton-X-100 (PBT) and 4% paraformaldehyde (PFA, E.M.S. Scientific) on ice, and multiple samples were collected in the same tube. Samples were then fixed in PBT + PFA at room temperature for 30 minutes, washed twice in methanol and twice in ethanol at room temperature, and stored at -20°C.

## ***In situ hybridization and imaging***

We used an InsituPro VSi robot to perform *in situ* hybridization. Briefly, dissected terminalia were rehydrated in PBT, fixed in PBT with 4% PFA and prehybridized in hybridization buffer for 1 hr at 65°C. Samples were then incubated with probe for 16h at 65°C before washing with hybridization buffer and PBT. Samples were blocked in PBT with 1% bovine serum albumin (PBT+BSA) for 2 hours. Samples were then incubated with anti-digoxigenin Fab fragments conjugated to alkaline phosphatase (Roche) diluted 1:6000 in PBT+BSA. After additional washes, color reactions were performed by incubating samples with NBT and BCIP (Promega) until purple stain could be detected under a dissecting microscope. Samples were mounted in glycerol on microscope slides coated with poly-L-lysine and imaged at 20X or 40X magnification on a Leica DM 2000 with a Leica DFC540 C camera. For most images available online, extended focus compilations were acquired using the ImageBuilder module of the Leica Application Suite.

In interpreting our results, we performed several qualitative comparisons to increase our confidence in the data. First, we processed samples from both time points simultaneously in the same basket and staining well. For many genes, we observed uniform expression in 28h samples but patterned expression in 48h samples. These observations gave us confidence that the uniform early expression was not due to background staining. Similarly, we occasionally observed expression patterns in samples from one time point but not the other, which fostered confidence that the absence of expression was not due to experimental failure. As an additional safeguard, we compared results from different genes stained in the same batch to detect cross-contamination. Finally, we compared equivalent samples in annotating our results, such that the representative images presented in this manuscript were corroborated by replicates.



# Results

## Global measurements of gene expression levels in early pupal terminalia

To identify transcription factors that may play a role in genital and anal development, we performed RNA-seq on early pupal terminalia dissected at 24 hours and 28 hours after puparium formation (APF). We found that 11,816 genes are expressed at levels greater than 1 read per kilobase per million reads (rpkm) in at least 1 time point, including 282 annotated transcription factors (Pfreundt *et al.* 2010). Among the 100 most highly expressed transcription factors at 28 hours APF, the expression levels ranged from 442 to 27 rpkm (Figure 1C). These genes formed the basis for our gene expression atlas.

## An atlas of the genital transcription factor landscape

Our transcriptomic analysis suggested that a large number of transcription factors are expressed in the pupal terminalia. In order to glean spatial and temporal expression information for these candidates, we performed *in situ* hybridization (ISH) in pupal terminalia at 28 hours and 48 hours APF. ISH measurements are qualitative and variable – distinguishing signal from background can be challenging, especially for genes that are uniformly expressed, and results may vary between biological replicates. We addressed these challenges through several comparisons (see Materials and Methods). In addition to the results presented here, our full dataset is housed online at [flygenitalia.biology.pitt.edu](http://flygenitalia.biology.pitt.edu). We built this database to increase the accessibility, transparency and reproducibility of our results. We include full protocols for our methods as well as key experimental details underlying the results for each experiment. For each gene, we also include annotations of all tissues in which evidence of gene expression was observed. Finally, to accurately represent the variability in our results, this database includes images of all samples that met the quality control standards of our experimental pipeline.

For the remainder of the manuscript, we organize our results by describing select transcription factors expressed in each structure of the terminalia.

## The Epandrial Ventral Lobe (Lateral Plate)

The epandrial ventral lobe (EVL, also called the lateral plate) is a periphallallic structure lateral to the phallus (Rice *et al.* 2019b). The epandrial posterior lobe (hereafter referred to as the posterior lobe) develops from the EVL (Glassford *et al.* 2015) and is a key diagnostic feature of the *melanogaster* clade (Coyne 1983; Markow and O'Grady 2005). Multiple groups have attempted to map the genomic regions associated with morphological changes in the posterior lobe (Macdonald and Goldstein 1999; Zeng *et al.* 2000; Masly *et al.* 2011; McNeil *et al.* 2011; Tanaka *et al.* 2015; Takahara and Takahashi 2015). In addition, a previous study identified a gene regulatory network associated with posterior lobe development that also functions in the development of the posterior spiracle, a larval structure involved in gas exchange (Glassford *et*



226 *al.* 2015). Multiple transcription factors within the posterior lobe network appeared among our  
227 candidates, and we used these genes as positive controls for our methods.

228 At 28h APF, the tissue that will form the surstylus and the EVL exists as a single  
229 continuous epithelium that later undergoes cleavage to form both structures by 48h APF (Figure  
230 1B, (Glassford *et al.* 2015). Hereafter, we refer to this single structure as the epandrial ventral  
231 lobe / surstylus (EVL/S). In accordance with previous results, we found that *Pox neuro* (*Poxn*) is  
232 expressed in the EVL/S at 28h APF and the EVL at 48h APF (Figure 2A). In addition to *Poxn*,  
233 we found that *Abdominal-B* and *empty spiracles* are expressed in the EVL/S and EVL, as well  
234 as within the posterior lobe domain (Figure 2C-E); both genes were previously identified as  
235 posterior lobe network components (Glassford *et al.* 2015).

236 In addition to these known factors, we identified many other transcription factors  
237 expressed in the EVL and posterior lobe. We found that *E5* is expressed in the posterior lobe,  
238 the ventral portion of the EVL (see additional samples online), and the phallus. *E5* is a  
239 homeodomain transcription factor (Dalton *et al.* 1989) associated with variation in posterior lobe  
240 morphology among *Drosophila melanogaster* populations (Takahashi *et al.* 2018). We also  
241 found that *brother of odd with entrails limited* (*bowl*) is expressed in the posterior lobe at 48  
242 hours APF, as well as other tissues throughout the terminalia (Figure 2C-E). *bowl* is a target of  
243 Notch signalling and has been previously implicated in leg development and epithelial  
244 rearrangements in the hindgut (Iwaki *et al.* 2001; de Celis Ibeas and Bray 2003).

245 In addition to genes localized within the posterior lobe, we found that *escargot* (*esg*) and  
246 *grainyhead* (*grh*) are expressed in the EVL at both timepoints, but occupy a compartment  
247 medial to the posterior lobe – both are expressed near the location where EVL tissue separate  
248 from the surstylus (Figure 2C-E). *esg* is a *snail*-related transcription factor that functions in the  
249 development of larval imaginal discs (Whiteley *et al.* 1992; Hayashi *et al.* 1993; Fuse *et al.*  
250 1996), while *grh* is associated with the maternal-zygotic transition during embryonic  
251 development, as well as morphogenetic processes in several developmental contexts  
252 (Hemphälä *et al.* 2003; Narasimha *et al.* 2008; Harrison *et al.* 2010).

253 We did not identify a transcription factor that serves as a unique/non-ambiguous marker  
254 for the EVL or the posterior lobe – all genes expressed in the EVL were also expressed in at  
255 least one other tissue (Figure 2C and D). For example, *Abd-B*, *ems*, *E5* and *esg* accumulate  
256 mRNA in the posterior lobe and phallus, but within different phallic substructures (Figure 2C,  
257 see below for descriptions of phallic morphology). *grh* and *bowl* are also expressed in other,  
258 distinct terminal structures (Figure 2C). Thus, transcription factors expressed in these structures  
259 are not unique, but show patterns of co-expression which differ from factor to factor.

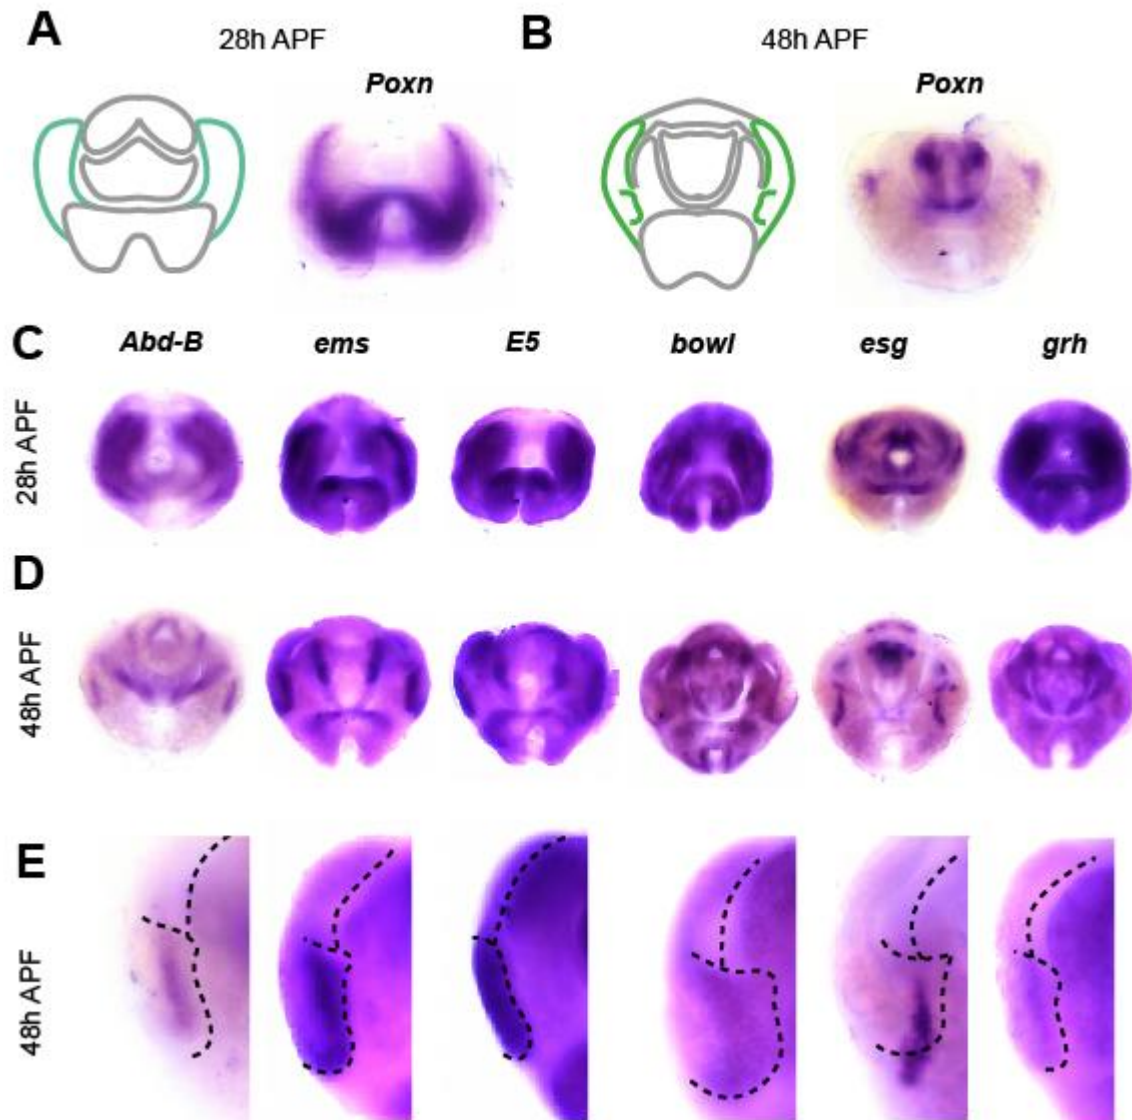

**Figure 2: Transcription factors expressed in the epandrial ventral lobe (EVL).** A) Left: schematic of major terminal structures at 28 hours APF with the epandrial ventral lobe / surstylus highlighted in turquoise. Right: Light microscopy image of *in situ* hybridization data for *Pox neuro* mRNA at 28 hours APF. Purple signal indicates localization of target mRNA. B) Left: schematic of major terminal structures at 48 hours APF with the EVL and posterior lobe highlighted in green. Right: Light microscopy image of *in situ* hybridization data for *Poxn* mRNA at 48 hours APF. Additional *In situ* hybridization data for EVL-specific factors at 28 hours APF (C) 48 hours (D), and in closeups at 48h (E). The boundaries of the posterior lobe and the medial boundary of the EVL are indicated by dashed lines.

## The Surstylus (Clasper)

The surstylus (also known as the clasper) is a curled outgrowth located medial to the EVL (Rice *et al.* 2019b). Like the posterior lobe, the surstylus exhibits morphological differences between closely related species in the *melanogaster* subgroup (Bock, I.R. & Wheeler, M.R. 1972), and has been the focus of quantitative trait locus (QTL) mapping efforts (True *et al.* 1997; Tanaka *et al.* 2015). A recent study identified *tartan*, a cell adhesion protein, as a gene that contributes to changes in surstylus morphology between *Drosophila simulans* and *Drosophila mauritiana* (Hagen *et al.* 2018). However, while RNAi experiments in *Drosophila melanogaster* have identified several genes that influence surstylus morphology (Tanaka *et al.* 2015), little is known about the gene regulatory network that governs its development during pupal stages.

We found that *odd-paired* (*opa*) is expressed exclusively in the surstylus at 48h APF, as well as the medial portion of the EVL/S at 28h APF (Figure 3A and B). These data suggest that *opa* is a surstylus-specific marker, and can also identify presumptive surstylus tissue prior to its cleavage from the EVL. In other tissues, *opa* controls the formation of parasegment boundaries during embryogenesis (Clark and Akam 2016), as well as morphogenetic events in the formation of the midgut and head (Cimborra and Sakonju 1995; Lee *et al.* 2007).

In addition to *opa*, we found transcription factors expressed in specific subcompartments of the surstylus. *Drop* (*Dr*) is expressed in presumptive surstylus tissue at 28h APF, as well as a more restricted compartment at 48h APF, which may represent the boundary between the surstylus and the EVL (Figure 3, C and E). *Dr* has been previously implicated in genital development and is expressed in larval (L3) genital discs (Chatterjee *et al.* 2011). We also found that *C15* is expressed in a dorsal-medial compartment of the presumptive surstylus at 28h APF, as well as at the base of the surstylus at 48h APF (Figure 3, D and F). *C15* functions in the development of the amnioserosa during embryogenesis (Rafiqi *et al.* 2008), as well as during leg development where it interacts with *apterous* and *bowl* (Campbell 2005), both of which exhibit patterned expression in the pupal terminalia (see [flygenitalia.biology.pitt.edu](http://flygenitalia.biology.pitt.edu)). These data show that like the EVL, the surstylus can be delineated into subcompartments by the expression patterns of transcription factors during pupal development.

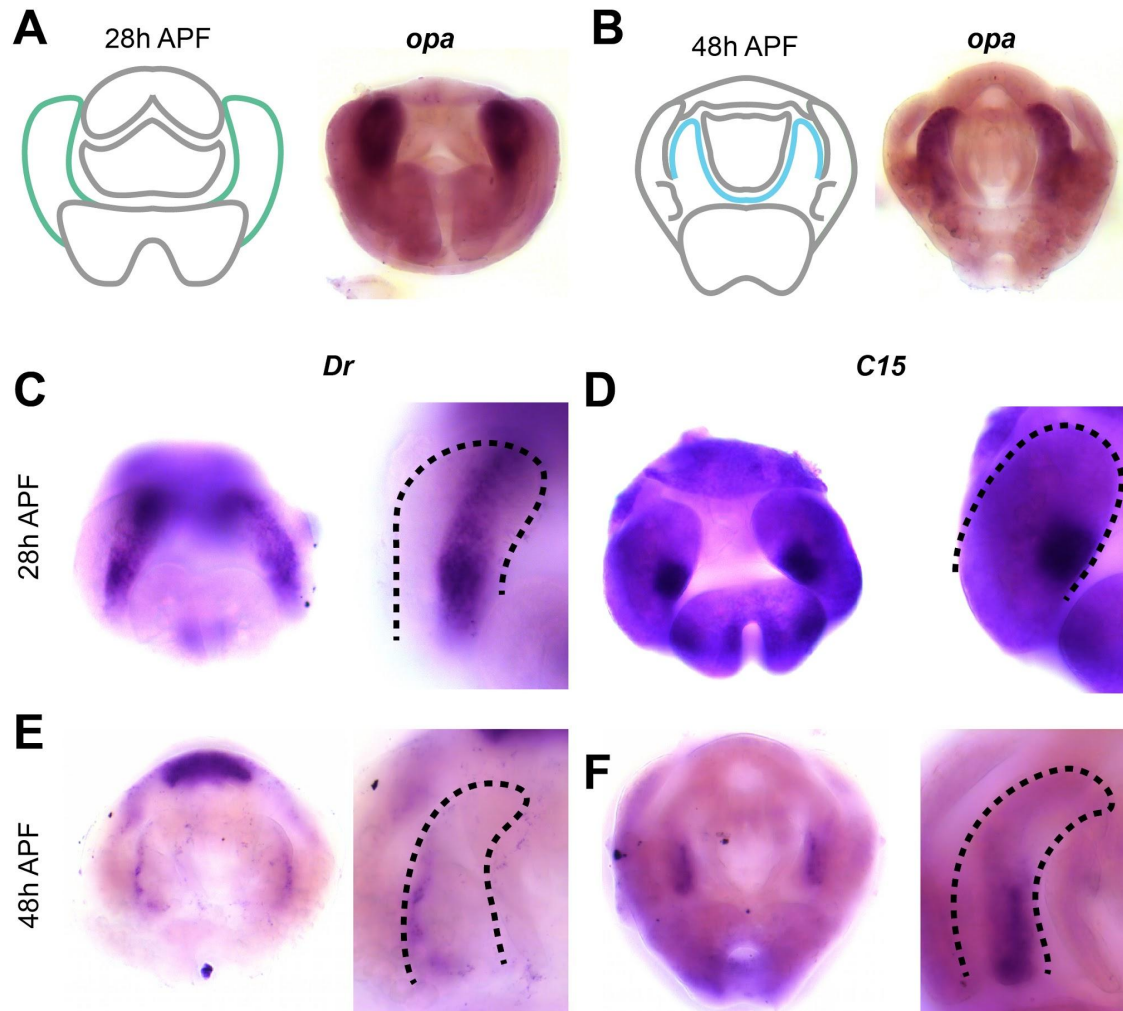

**Figure 3: Transcription factors expressed in the surstylus.** A) Left: schematic of major terminal structures at 28 hours APF with the epandrial ventral lobe / surstylus indicated in turquoise. Right: Light microscopy image of *in situ* hybridization data for *odd-paired* mRNA at 28 hours APF. B) Left: schematic of major terminal structures at 48 hours APF with the surstylus outlined in cyan. Right: Light microscope image of *in situ* hybridization data for *odd-paired* mRNA at 48 hours APF. (C-D) *in situ* hybridization data for *Drop* mRNA in whole terminalia (left) and at higher magnification (right) at 28 hours APF (C) and at 48 hours APF (D). (E-F) *in situ* hybridization data for *C15* mRNA in whole terminalia (left) and at higher magnification (right) at 28 hours APF (E) and 48 hours APF (F). Dashed lines indicate the boundary of the EVL/surstylus (C and D) or the surstylus (E and F).



## The Cercus (Anal plate)

The cercus (anal plate) is composed of two flat, semicircular sheets of cuticle on the dorsal side of the terminalia (Rice *et al.* 2019b). The cercus is derived from abdominal segment 10 while the rest of the male terminalia originates from abdominal segment 9 (Keisman *et al.* 2001). This structure shows dramatic variation in bristle number and morphology within and between *Drosophilid* species (Lachaise *et al.* 1981; Kopp and True 2002), which in some cases have been implicated in reproductive incompatibility (Tanaka *et al.* 2018). QTL analysis for differences in the total cercus area between *D. mauritiana* and *D. simulans* identified causative genomic regions, but were unable to resolve these to the level of individual genes (True *et al.* 1997; Tanaka *et al.* 2015). We note that our annotations of genes expressed in the cercus may include expression patterns that localize to the developing epandrial dorsal lobe (EDL) and subepandrial sclerite. In the pupal terminalia, the cercus, subepandrial sclerite, and EDL are continuously joined, and their boundaries are unclear, however when possible we differentiate them below.

We found that *caudal* (*cad*) was expressed throughout the cercus at both time points, as well as the tissue that connects the surstyli together (subepandrial sclerite) at 48h APF (Figure 4, A and B). We did not observe *cad* expression in other structures; thus *caudal* serves as a marker for these tissues at this stage of development. *cad*, which functions in the anterior-posterior patterning network in embryogenesis (Macdonald and Struhl 1986; Rivera-Pomar *et al.* 1995; Olesnický *et al.* 2006; Vincent *et al.* 2018), has been previously implicated in the development of the cercus and interacts with the genes *Distalless* (*Dll*) and *brachyenteron* (*byn*) in the L3 genital disc (Moreno and Morata 1999).

We also identified several transcription factors that are expressed in distinct subcompartments of the cercus. *C15* was expressed in the lateral boundaries, while *doublesex* (*dsx*) was expressed on the anterior-ventral face. *dsx* is a known regulator of sexually dimorphic traits (Hildreth 1965; Baker and Ridge 1980). *forkhead domain 96Cb* (*fd96Cb*) was expressed only in the medial portion of the ventral side in a pattern that clearly resolves by 48h APF. *invected* (*inv*) was expressed on the dorsal and lateral sides along with *engrailed*; these genes are partially redundant in other tissues and specify the anterior compartment of other abdominal segments (Kopp *et al.* 1997), including the terminalia (Epper and Sánchez 1983; Chen and Baker 1997; Casares *et al.* 1997). Finally, several genes are expressed in the developing rectum, including *Dr* (Figure 3C-E), *knirps*, and *tramtrack* (see [flygenitalia.biology.pitt.edu](http://flygenitalia.biology.pitt.edu)).

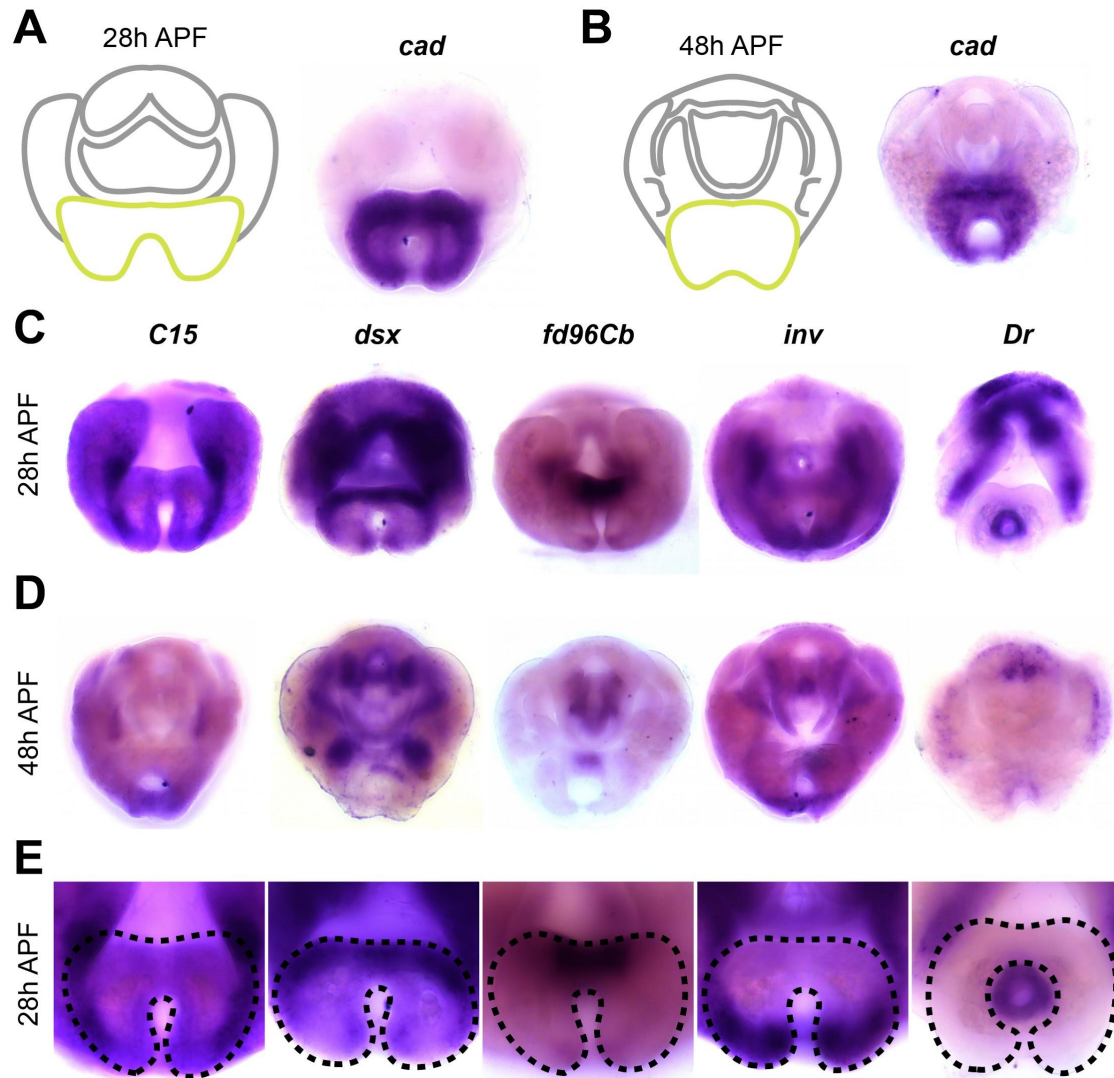

**Figure 4: Transcription factors expressed in the cercus**

A) Left: schematic of major terminal structures at 28 hours APF with the cercus indicated in yellow. Right: Light microscopy image of *in situ* hybridization data for *cad* mRNA at 28 hours APF. B) Left: schematic of major terminal structures at 48 hours APF with the cercus indicated in yellow. Right: Light microscopy image of *in situ* hybridization data for *cad* mRNA at 48 hours APF. *In situ* hybridization data for transcription factors *fd96Cb*, *C15*, *dsx*, *inv*, *Dr* at 28 hours APF (C), 48h (D), and in closeups at 28h (E). Dashed lines indicate the boundary of the cercus.

## The Hypandrium

The hypandrium is a plate-like structure that flanks the phallus on the ventral side (Rice *et al.* 2019b). The hypandrium contains several substructures, including the hypandrial phragma, medial gonocoxite, pregonites, lateral gonocoxites, and (Figure 1C). Within the hypandrium, the lateral gonocoxite and the pregonites exhibit rapid evolution across Drosophilids (Okada 1954; Kamimura and Mitsumoto 2011). While few genes have been previously implicated in hypandrial development, genetic perturbations in *Dr* cause changes in hypandrial morphology (Chatterjee *et al.* 2011), and one study localized the loss of hypandrial bristles to a *cis*-regulatory element of the *scute* gene (Nagy *et al.* 2018).

We found that *Dichaete* (*D*) is expressed in the hypandrial phragma (i.e. deep into the sample when viewed from the posterior) at both time points (Figure 5A and B). *D* is a member of the Sox family of transcription factor genes and is critical in embryogenesis (Russell *et al.* 1996). We also found that several transcription factors are expressed in hypandrial substructures. For example, *Dr* is expressed throughout the medial gonocoxite and weakly in the hypandrial phragma (Figure 5D). In contrast, *esg* is localized to the base of the pregonites as well as the posterior tip of the lateral gonocoxite (Figure 5E). Taken together, we found discrete gene expression patterns within the pupal domains of or the annotated hypandrial substructures.



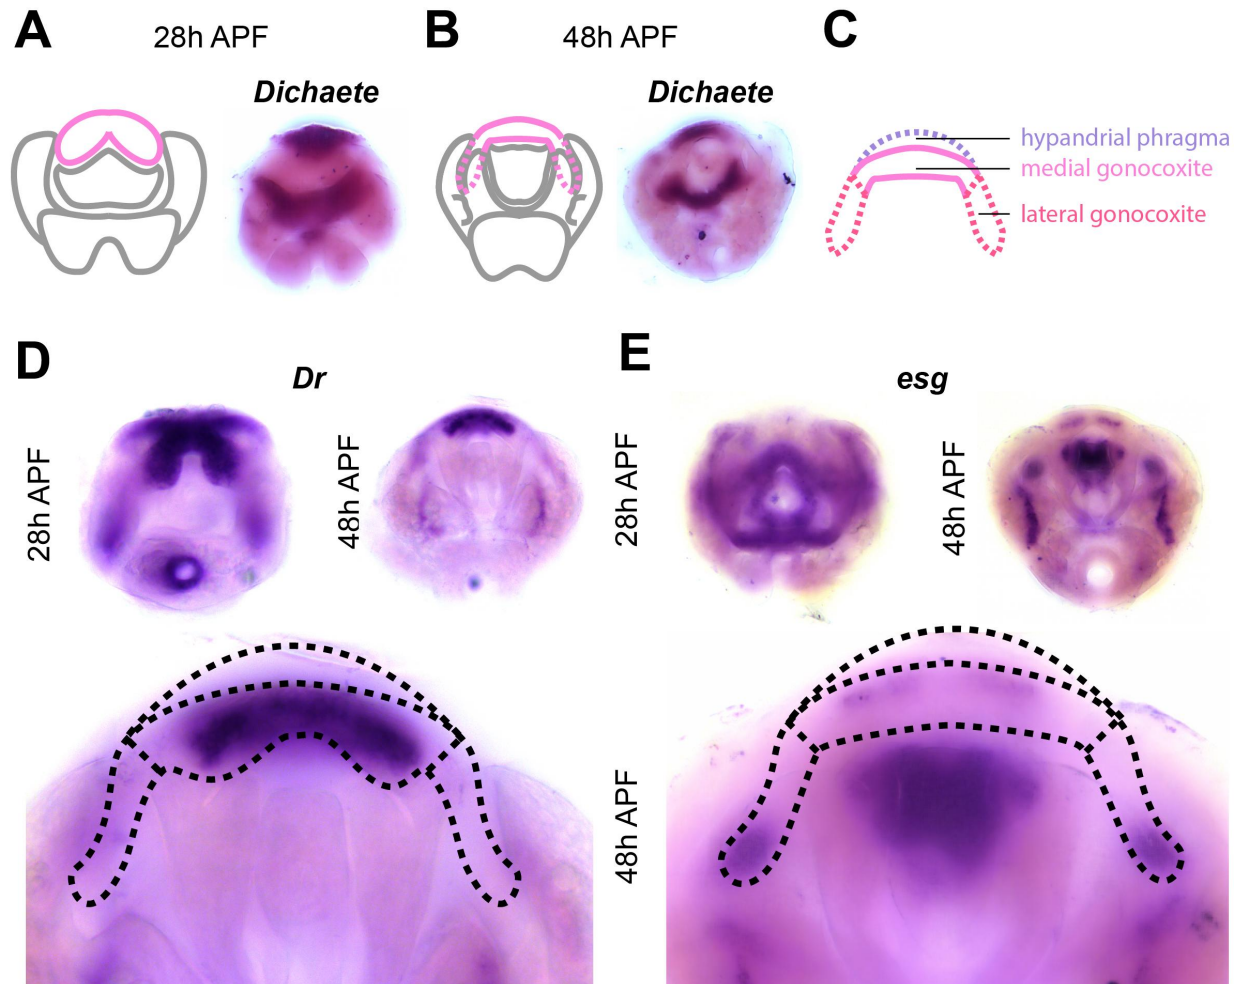

**Figure 5 Transcription factors expressed in the hypandrium.** A) Left: schematic of major terminal structures at 28 hours APF with the hypandrium indicated in pink. Right: Light microscopy image of *in situ* hybridization data for *Dichaete* (*D*) mRNA at 28 hours APF. B) Left: schematic of major terminal structures at 48 hours APF with the hypandrium indicated in pink. Right: Light microscopy image of *in situ* hybridization data for *D* mRNA at 48 hours APF. C) Cartoon representation of the substructures of the hypandrium: hypandrial phragma (purple), medial gonocoxite (pink), and lateral gonocoxite (red). Dashed lines indicate substructures that are obscured by other parts of the terminalia. *in situ* hybridization data at Left: 28 hours APF, Right: 48 hours APF (right), and Bottom: high magnification images of 48hr APF samples to illustrate details of hypandrial expression patterns for *Dr* (D) and *esg* (E). The boundaries of substructures are indicated by dashed lines.

## The Phallus

The phallus is the male genital organ used for intromission and is composed of four substructures: aedeagus, aedeagal sheath, dorsal postgonites, and ventral postgonites (Rice *et al.* 2019b). Each of these substructures exhibits morphological changes within the *melanogaster* species group (Okada 1954; Kamimura and Mitsumoto 2011), and QTL mapping has identified genomic regions associated with some of these differences (Peluffo *et al.* 2015). Here, we confirmed that *Poxn* is expressed throughout the phallus (Figure 6D), which is consistent with previous observations that *Poxn* is essential for phallic development (Boll and Noll 2002; Glassford *et al.* 2015).

The aedeagus is a phallic structure that delivers sperm and exhibits a needle-like shape in *D. melanogaster*. We identified genes that are expressed along the dorsal-ventral axis of the aedeagus in what appear to be non-overlapping patterns. We found that *gooseberry* (*gsb*) was exclusively expressed in the ventral portion of the aedeagus at both 28 and 48hrs APF (Figure 6A and B). *gsb* was previously found to be expressed in the anterior-ventral edge in L3 genital discs (Freeland and Kuhn 1996), and is a segment polarity gene that interacts with *wingless* during embryogenesis (Li and Noll 1993). We also found that *Polycomb-like* (*Pcl*) was expressed in the same compartment as *gsb* at 48h APF, but exhibits broader expression at 28h APF (Figure 6D–F). Reciprocally, we found that *fd96Cb* was expressed in the dorsal portion of the aedeagus. Finally, we identified genes expressed in other aedeagal subcompartments. For example, we found that *esg* was restricted to the anterior base of the aedeagus, while *retained* (*retn*), *inv* and *en* are expressed in the opening of the aedeagus, known as the phallotrema.

The aedeagal sheath along with the dorsal and ventral postgonites are two phallic substructures situated lateral to the aedeagus (Figure 6C). The aedeagal sheath consists of two flat, shield-like extensions that bilaterally flank the aedeagus. We found that several genes were expressed in the sheath, including *fd96Cb* and *retn*. The dorsal and ventral postgonites are two pairs of spike-like extensions that project from the aedeagal sheath. We found that *esg* is expressed at the base of both pairs of postgonites, while *fd96Cb* was expressed throughout the entire structure of both pairs of postgonites. We also found that *retn* (Figure 6F) and *dsx* ([flygenitalia.biology.pitt.edu](http://flygenitalia.biology.pitt.edu)) are expressed in the ventral postgonites, but not the dorsal pair, and we note that *dsx* has a known enhancer that drives expression in this region (Rice *et al.* 2019a). Taken together, we identified genes that are expressed in distinct phallic structures, as well as within subcompartments of individual structures.

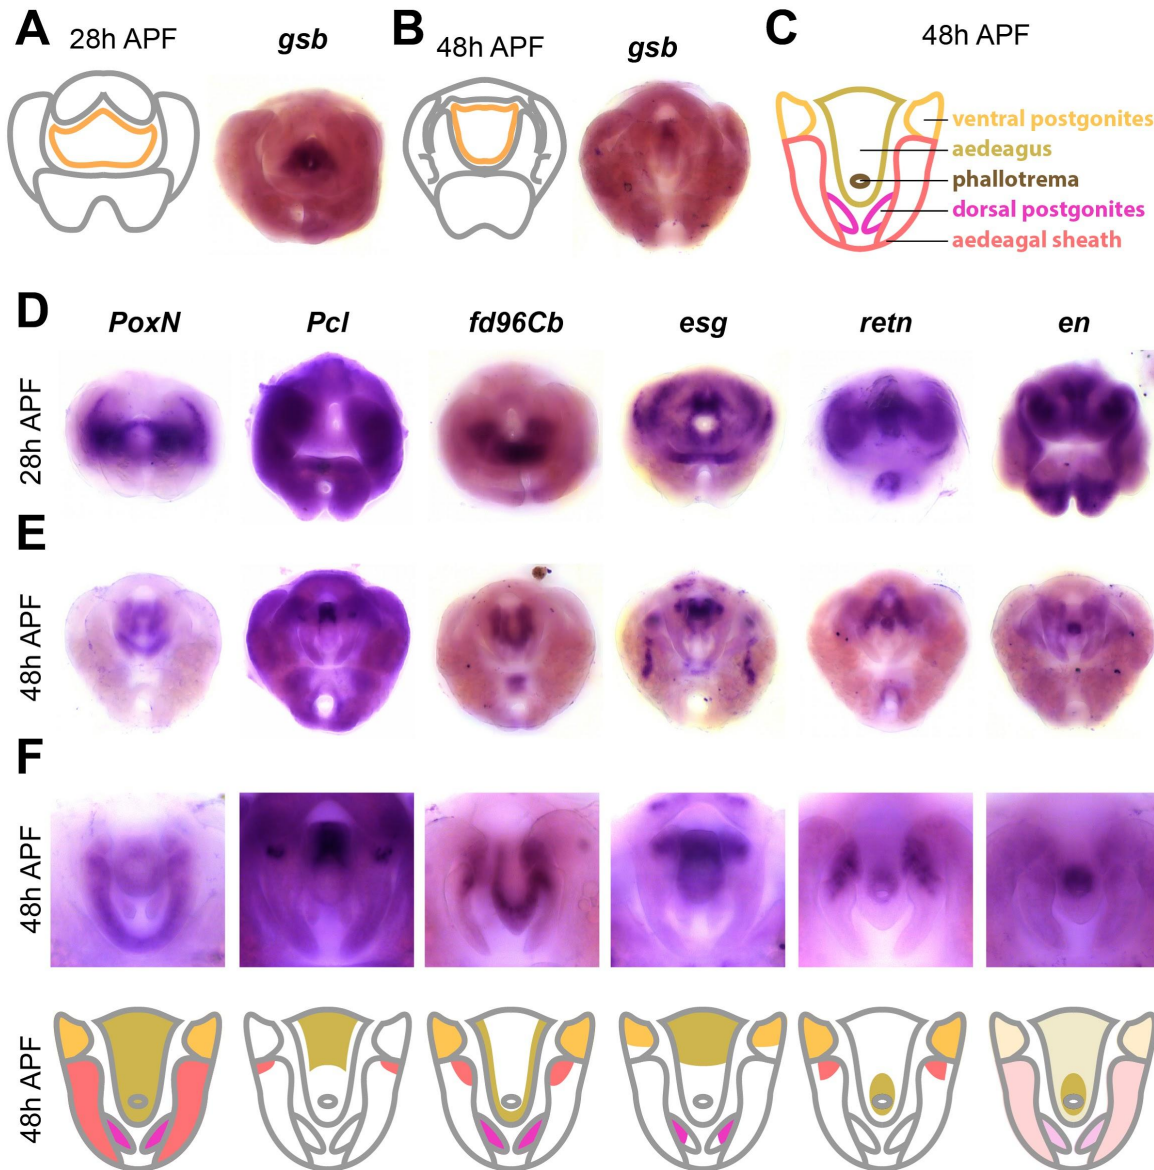

**Figure 6: Transcription factors expressed in the phallus**

A) Left: schematic of major terminal structures at 28 hours APF with the phallus indicated in orange. Right: Light microscope image of *in situ* hybridization data for *gsb* mRNA at 28 hours APF. B) Left: schematic of major terminal structures at 48 hours APF with the phallus indicated in orange. Right: Light microscopy image of *in situ* hybridization data for *gsb* mRNA at 48 hours APF. C) Cartoon representation of the substructures of the phallus: ventral postgonite (orange), aedeagus (yellow), phallotrema (brown), dorsal postgonites (pink), and aedeagal sheath (red). Additional *In situ* hybridization data for transcription factors *PoxN*, *esg*, *fd96Cb*, *retn*, *Plc*, and *en* at 28 hours APF (D) and 48 hours APF (E). F) Top: High magnification images of the samples shown in (E) to illustrate details of phallus expression patterns. Bottom: Cartoon representation of the substructures of the phallus, with shading indicating expression within each substructure. Note that for *en*, light shading indicates weak expression throughout the phallus.

## Discussion

In this study, we profiled the transcriptome of the male pupal terminalia in *D. melanogaster* at critical timepoints when major adult structures form. We then determined the spatiotemporal gene expression patterns of the 100 most highly expressed transcription factors during this stage. We identified transcription factors that were expressed in the five major terminal structures, as well as several substructures that exhibit morphological diversity between species. We discuss the implications of our results for the development and evolution of terminalia in Drosophilids.

### *Drosophila* terminalia as a model system

To appreciate the transformative power of a gene expression atlas, we need to look no further than the *Drosophila melanogaster* embryo. Beginning with the iconic Heidelberg screen (Nüsslein-Volhard and Wieschaus 1980; Wieschaus and Nüsslein-Volhard 2016), which identified genes that control embryonic patterning, many groups have contributed to the development and dissemination of genetic resources for studies in embryogenesis. These resources include transcriptomic profiling (Lott *et al.* 2011) and expression atlases of nearly all genes detectable during this stage of development (Tomancak *et al.* 2007; Lécuyer *et al.* 2007). Quantitative gene expression atlases are now available at cellular resolution for multiple genetic backgrounds and in different species (Fowlkes *et al.* 2008, 2011; Pisarev *et al.* 2009; Staller *et al.* 2015; Karaikos *et al.* 2017). These atlases enable computational models of gene regulatory networks and enhancer function that have provided insights into the evolution of patterning networks (Wunderlich *et al.* 2012; Wotton *et al.* 2015). However, these resources have revealed that the gene regulatory network which patterns the embryo evolves slowly, producing subtle quantitative changes in gene expression even between distantly related Drosophilids (Fowlkes *et al.* 2011; Wunderlich *et al.* 2019). In contrast, the terminalia contain multiple rapidly evolving structures which can illuminate important and under-explored aspects of gene regulatory network evolution.

We envision this atlas of 100 transcription factors as a first step towards building a comprehensive system for the study of developmental network function and evolution. Our RNA-seq data suggest that additional transcription factors are expressed at 28 hours APF, and it is possible that transcriptomic measurements at other time points or with different methods will reveal additional candidates. We will continue to add additional gene expression measurements to FlyGenitalia ([flygenitalia.biology.pitt.edu](http://flygenitalia.biology.pitt.edu)) as these candidates are pursued. In particular, our atlas provides a foundation for performing and analyzing single-cell RNA-seq experiments on developing pupal terminalia. While single-cell RNA-seq data provide more highly-resolved information on cell types, they do not contain anatomical information on the spatial organization of those cell types. We therefore anticipate that this atlas will permit one to annotate and interpret single-cell RNA-seq data. In the future, we hope to expand FlyGenitalia to include expression patterns in the developing female terminalia, which are historically understudied (Hosken and Stockley 2004; Ah-King *et al.* 2014), as well as expression measurements in other



species. By continuing to develop these resources, we hope that *Drosophila terminalia* will become a premiere model system to address many questions in evolution and development.

## Implications for genital evolution

Most of the recent work on the genetic basis of genital evolution has been confined to variation within species and between crossable species (True *et al.* 1997; Zeng *et al.* 2000; Masly *et al.* 2011; Tanaka *et al.* 2015, 2018; Peluffo *et al.* 2015). However, even for the most extensively studied genital traits, only a portion of the heritable changes have been resolved to the level of individual genes (Hagen *et al.* 2018; Nagy *et al.* 2018). This atlas may thus provide useful candidates for numerous unresolved QTL peaks. In addition, many traits evolve on macroevolutionary time scales, excluding the possibility of QTL analysis. Previous work used a comparative analysis of gene expression to identify a network of genes that was co-opted to the posterior lobe – a novel trait restricted to the *melanogaster* clade (Glassford *et al.* 2015). However, the *D. melanogaster* clade contains other unique traits, including structures whose gene regulatory networks have not been previously characterized. In this study, we found several genes that are expressed in lateral gonocoxite (*esg*, *inv*, *en*), and postgonites (*esg*, *fd96Cb*, *crp*, *mod*, *retn* and *dsx*), both of which exhibit morphological changes between species. Furthermore, a ventral postgonite enhancer was recently identified for the gene *doublesex* (Rice *et al.* 2019a) which may be a useful gene expression driver to manipulate this structure in the future. Other enhancers that drive expression in the larval genital disc may persist in the pupal terminalia and may serve as drivers to target other structures (Jory *et al.* 2012). To assess the functional roles of individual genital structures in copulation, genetic disruption may help complement other techniques such as laser ablation (Polak and Rashed 2010; Kamimura and Polak 2011; LeVasseur-Viens *et al.* 2015).

Rapid morphological changes between species hamper the identification of homology in the genitalia and cercus. Structural homology has previously been defined by similarities in adult morphology, but structures that appear similar may nevertheless not be related by common descent. As a result, there are conflicting claims of homology – the same structure in one species has been called homologous to different structures in other species (Frank *et al.* 1987; Grimaldi David A 1990). Based on our results, we suggest that gene expression profiles may be useful in reconciling conflicting claims of homology. For example, homology is difficult to establish for the postgonites, often referred to as parameres or branches (Kamimura 2007; Yassin and Orgogozo 2013; Peluffo *et al.* 2015). Here, we identified genes that are expressed in both pairs of postgonites (*fd96Cb*, and *esg*), which may help to define homologous structures in other species.

## Implications for genital development

In mapping the transcription factor landscape in the pupal terminalia, we have begun defining the gene regulatory networks that operate in the development of these structures. Identifying relevant transcription factors and measuring their gene expression patterns is an important first step, but we must also determine how these genes interact. At this point, we can

infer regulatory interactions by looking for incidences of co-expression or reciprocal expression. For example, it would be interesting to test whether transcription factors expressed in the entirety of particular structures, such as the surstylus marker *odd-paired*, are required for expression of other genes deployed in more restricted subcompartments, such as *C15*. Some of these genes have known regulatory interactions in other contexts, such as *apterous*, *C15*, and *bowl* (Campbell 2005). While this atlas can be a tool for generating hypotheses about how these gene regulatory networks are wired, these hypotheses must ultimately be rigorously tested via genetic perturbation.

Locating the regulatory DNA that controls these expression patterns will also be critical for defining relevant gene regulatory networks. One notable feature of our results is that most of the identified transcription factors are expressed in multiple locations throughout the pupal terminalia, especially at 48h APF. It remains unclear whether these patterns are controlled by multiple regulatory elements, or if disparate patterns are generated by the same enhancer region (Small *et al.* 1996). It is possible that the enhancers controlling these patterns also operate in other tissues or at different developmental stages (Noon *et al.* 2018; Sabaris *et al.* 2019), as is the case for the posterior lobe enhancer of *Pox neuro* (Glassford *et al.* 2015) and the hypandrial enhancer of *scute* (Nagy *et al.* 2018). By finding the regulatory sequences that control these gene expression patterns, we can determine the direct targets of transcription factors in this system.

Epithelial remodeling is a critical component of many developmental events, including gastrulation, neural tube formation, and organogenesis (Neumann and Affolter 2006). Studying these processes in *Drosophila* tissues, such as the wing disc and the trachea, has yielded insights into similar processes in mammals (Affolter *et al.* 2003). We focus here on patterned transcription factors because morphogenetic processes are tightly regulated at the level of gene expression. However, we are ultimately interested in the connections between transcription factors and the effectors that ultimately dictate cell behavior (Smith *et al.* 2018). Recent work has implicated a variety of cellular mechanisms in the formation of genital structures, including changes in cell size and cell intercalations in the developing ovipositor (Green *et al.* 2019) and the influence of the apical extracellular matrix in the developing posterior lobe (Smith, *et al.* submitted). In the future, we hope to characterize the functional roles of transcription factors in both cellular dynamics and adult morphology, and elucidate how the expression and function of these genes are tuned to generate new or different structures over evolutionary time.

## Acknowledgments:

We thank the entire Rebeiz lab for assistance optimizing the *in situ* hybridization protocol and helpful discussions, especially Eden McQueen and Donya Shodja for comments on the manuscript. Artoo Situ deserves special recognition for autonomous assistance with *in situ* hybridization. We also thank the University of Pittsburgh Center for Research Computing, especially Kim Wong for technical help on building and hosting website. This project was supported by the Stowers Institute for Medical Research and the National Institutes of Health (GM107387 to MR, 1F32GM130034 to BJV and 1F32GM125329 to WJG).

# References

- Affolter M., S. Bellusci, N. Itoh, B. Shilo, J.-P. Thiery, *et al.*, 2003 Tube or not tube: remodeling epithelial tissues by branching morphogenesis. *Dev. Cell* 4: 11–18.
- Ah-King M., A. B. Barron, and M. E. Herberstein, 2014 Genital evolution: why are females still understudied? *PLoS Biol.* 12: e1001851.
- Baker B. S., and K. A. Ridge, 1980 Sex and the single cell. I. On the action of major loci affecting sex determination in *Drosophila melanogaster*. *Genetics* 94: 383–423.
- Bock, I.R. & Wheeler, M.R., 1972 The *Drosophila melanogaster* species group. University of Texas Publication 7213: 1–102.
- Boll W., and M. Noll, 2002 The *Drosophila* Pox neuro gene: control of male courtship behavior and fertility as revealed by a complete dissection of all enhancers. *Development* 129: 5667–5681.
- Brennan P. L. R., and R. O. Prum, 2015 Mechanisms and Evidence of Genital Coevolution: The Roles of Natural Selection, Mate Choice, and Sexual Conflict. *Cold Spring Harb. Perspect. Biol.* 7: a017749.
- Campbell G., 2005 Regulation of gene expression in the distal region of the *Drosophila* leg by the Hox11 homolog, C15. *Dev. Biol.* 278: 607–618.
- Casares F., L. Sánchez, I. Guerrero, and E. Sánchez-Herrero, 1997 The genital disc of *Drosophila melanogaster*. : I. Segmental and compartmental organization. *Dev. Genes Evol.* 207: 216–228.
- Celis Ibeas J. M. de, and S. J. Bray, 2003 Bowl is required downstream of Notch for elaboration of distal limb patterning. *Development* 130: 5943–5952.
- Chatterjee S. S., L. D. Uppendahl, M. A. Chowdhury, P.-L. Ip, and M. L. Siegal, 2011 The female-specific doublesex isoform regulates pleiotropic transcription factors to pattern genital development in *Drosophila*. *Development* 138: 1099–1109.
- Chen E. H., and B. S. Baker, 1997 Compartmental organization of the *Drosophila* genital imaginal discs. *Development* 124: 205–218.
- Cimbora D. M., and S. Sakonju, 1995 *Drosophila* midgut morphogenesis requires the function of the segmentation gene odd-paired. *Dev. Biol.* 169: 580–595.
- Clark E., and M. Akam, 2016 Odd-paired controls frequency doubling in *Drosophila* segmentation by altering the pair-rule gene regulatory network. *Elife* 5. <https://doi.org/10.7554/eLife.18215>
- Coyne J. A., 1983 Genetic basis of differences in genital morphology among three sister



588 species of *Drosophila*. *Evolution* 37: 1101–1118.

589 Dalton D., R. Chadwick, and W. McGinnis, 1989 Expression and embryonic function of empty  
590 spiracles: a *Drosophila* homeo box gene with two patterning functions on the anterior-  
591 posterior axis of the embryo. *Genes Dev.* 3: 1940–1956.

592 Eberhard W. G., 1985 Sexual Selection and Animal Genitalia

593 Epper F., and L. Sánchez, 1983 Effects of engrailed in the genital disc of *Drosophila*  
594 melanogaster. *Dev. Biol.* 100: 387–398.

595 Fowlkes C. C., C. L. L. Hendriks, S. V. E. Keränen, G. H. Weber, O. Rübél, *et al.*, 2008 A  
596 quantitative spatiotemporal atlas of gene expression in the *Drosophila* blastoderm. *Cell*  
597 133: 364–374.

598 Fowlkes C. C., K. B. Eckenrode, M. D. Bragdon, M. Meyer, Z. Wunderlich, *et al.*, 2011 A  
599 conserved developmental patterning network produces quantitatively different output in  
600 multiple species of *Drosophila*, (A. Kopp, Ed.). *PLoS Genet.* 7: e1002346.

601 Frank et M., *Manual of nearctic Diptera*.

602 Freeland D. E., and D. T. Kuhn, 1996 Expression patterns of developmental genes reveal  
603 segment and parasegment organization of *D. melanogaster* genital discs. *Mech. Dev.* 56:  
604 61–72.

605 Fuse N., S. Hirose, and S. Hayashi, 1996 Determination of wing cell fate by the escargot and  
606 snail genes in *Drosophila*. *Development* 122: 1059–1067.

607 Glassford W. J., W. C. Johnson, N. R. Dall, S. J. Smith, Y. Liu, *et al.*, 2015 Co-option of an  
608 Ancestral Hox-Regulated Network Underlies a Recently Evolved Morphological Novelty.  
609 *Dev. Cell* 34: 520–531.

610 Gorfinkiel N., L. Sánchez, and I. Guerrero, 1999 *Drosophila* terminalia as an appendage-like  
611 structure. *Mech. Dev.* 86: 113–123.

612 Green J. E., M. Cavey, E. Médina Caturegli, B. Aigouy, N. Gompel, *et al.*, 2019 Evolution of  
613 Ovipositor Length in *Drosophila suzukii* Is Driven by Enhanced Cell Size Expansion and  
614 Anisotropic Tissue Reorganization. *Curr. Biol.* <https://doi.org/10.1016/j.cub.2019.05.020>

615 Grimaldi D. A., 1987 Phylogenetics and taxonomy of *Zygothrica* (Diptera: Drosophilidae).  
616 Filogenia y taxonomía de *Zygothrica* (Diptera: Drosophilidae). *Bull. Am. Mus. Nat. Hist.*  
617 186: 104–268.

618 Grimaldi David A, 1990 A phylogenetic, revised classification of genera in the Drosophilidae  
619 (Diptera). *Bull. Am. Mus. Nat. Hist.* 1–139.

620 Hagen J. F. D., C. C. Mendes, K. M. Tanaka, P. Gaspar, M. Kittelmann, *et al.*, 2018 tartan  
621 underlies the evolution of male genital morphology. *bioRxiv* 462259.

622 Harrison M. M., M. R. Botchan, and T. W. Cline, 2010 Grainyhead and Zelda compete for  
623 binding to the promoters of the earliest-expressed *Drosophila* genes. *Dev. Biol.* 345: 248–  
624 255.

625 Hayashi S., S. Hirose, T. Metcalfe, and A. D. Shirras, 1993 Control of imaginal cell development  
626 by the escargot gene of *Drosophila*. *Development* 118: 105–115.

627 Hemphälä J., A. Uv, R. Cantera, S. Bray, and C. Samakovlis, 2003 Grainy head controls apical  
628 membrane growth and tube elongation in response to Branchless/FGF signalling.  
629 *Development* 130: 249–258.

630 Hildreth P. E., 1965 Doublesex, recessive gene that transforms both males and females of  
631 *Drosophila* into intersexes. *Genetics* 51: 659–678.

632 Hosken D. J., and P. Stockley, 2004 Sexual selection and genital evolution. *Trends Ecol. Evol.*  
633 19: 87–93.

634 Iwaki D. D., K. A. Johansen, J. B. Singer, and J. A. Lengyel, 2001 drumstick, bowl, and lines are  
635 required for patterning and cell rearrangement in the *Drosophila* embryonic hindgut. *Dev.*  
636 *Biol.* 240: 611–626.

637 Jory A., C. Estella, M. W. Giorgianni, M. Slattery, T. R. Lavery, *et al.*, 2012 A survey of 6,300  
638 genomic fragments for cis-regulatory activity in the imaginal discs of *Drosophila*  
639 *melanogaster*. *Cell Rep.* 2: 1014–1024.

640 Kamimura Y., 2007 Twin intromittent organs of *Drosophila* for traumatic insemination. *Biol. Lett.*  
641 3: 401–404.

642 Kamimura Y., and H. Mitumoto, 2011 Comparative copulation anatomy of the *Drosophila*  
643 *melanogaster* species complex (Diptera: Drosophilidae). *Entomol. Sci.* 14: 399–410.

644 Kamimura Y., and M. Polak, 2011 Does surgical manipulation of *Drosophila* intromittent organs  
645 affect insemination success? *Proc. Biol. Sci.* 278: 815–816.

646 Karaïskos N., P. Wahle, J. Alles, A. Boltengagen, S. Ayoub, *et al.*, 2017 The *Drosophila* embryo  
647 at single-cell transcriptome resolution. *Science* 358: 194–199.

648 Keisman E. L., and B. S. Baker, 2001 The *Drosophila* sex determination hierarchy modulates  
649 wingless and decapentaplegic signaling to deploy dachshund sex-specifically in the genital  
650 imaginal disc. *Development* 128: 1643–1656.

651 Keisman E. L., A. E. Christiansen, and B. S. Baker, 2001 The sex determination gene  
652 doublesex regulates the A/P organizer to direct sex-specific patterns of growth in the  
653 *Drosophila* genital imaginal disc. *Dev. Cell* 1: 215–225.

654 Kopp A., M. A. Muskavitch, and I. Duncan, 1997 The roles of hedgehog and engrailed in  
655 patterning adult abdominal segments of *Drosophila*. *Development* 124: 3703–3714.

656 Kopp A., and J. R. True, 2002 Evolution of male sexual characters in the oriental *Drosophila*  
657 *melanogaster* species group. *Evol. Dev.* 4: 278–291.

658 Lachaise D., F. Lemeunier, and M. Veuille, 1981 Clinal Variations in Male Genitalia in  
659 *Drosophila teissieri* Tsacas. *Am. Nat.* 117: 600–608.

660 Lécuyer E., H. Yoshida, N. Parthasarathy, C. Alm, T. Babak, *et al.*, 2007 Global analysis of  
661 mRNA localization reveals a prominent role in organizing cellular architecture and function.  
662 *Cell* 131: 174–187.

663 Lee H., B. G. Stultz, and D. A. Hursh, 2007 The Zic family member, odd-paired, regulates the  
664 *Drosophila* BMP, decapentaplegic, during adult head development. *Development* 134:  
665 1301–1310.

666 LeVasseur-Viens H., M. Polak, and A. J. Moehring, 2015 No evidence for external genital  
667 morphology affecting cryptic female choice and reproductive isolation in *Drosophila*.  
668 *Evolution* 69: 1797–1807.

669 Levine M., and E. H. Davidson, 2005 Gene regulatory networks for development. *Proc. Natl.*  
670 *Acad. Sci. U. S. A.* 102: 4936–4942.

671 Li X., and M. Noll, 1993 Role of the gooseberry gene in *Drosophila* embryos: maintenance of  
672 wingless expression by a wingless--gooseberry autoregulatory loop. *EMBO J.* 12: 4499–  
673 4509.

674 Lott S. E., J. E. Villalta, G. P. Schroth, S. Luo, L. A. Tonkin, *et al.*, 2011 Noncanonical  
675 compensation of zygotic X transcription in early *Drosophila melanogaster* development  
676 revealed through single-embryo RNA-seq, (R. S. Hawley, Ed.). *PLoS Biol.* 9: e1000590.

677 Macdonald P. M., and G. Struhl, 1986 A molecular gradient in early *Drosophila* embryos and its  
678 role in specifying the body pattern. *Nature* 324: 537–545.

679 Macdonald S. J., and D. B. Goldstein, 1999 A quantitative genetic analysis of male sexual traits  
680 distinguishing the sibling species *Drosophila simulans* and *D. sechellia*. *Genetics* 153:  
681 1683–1699.

682 Markow T. A., and P. O'Grady, 2005 *Drosophila: A Guide to Species Identification and Use*.  
683 Academic Press.

684 Masly J. P., J. E. Dalton, S. Srivastava, L. Chen, and M. N. Arbeitman, 2011 The genetic basis  
685 of rapidly evolving male genital morphology in *Drosophila*. *Genetics* 189: 357–374.

686 Masly J. P., 2011 170 Years of “Lock-and-Key”: Genital Morphology and Reproductive Isolation.  
687 *Int. J. Evol. Biol.* 2012. <https://doi.org/10.1155/2012/247352>

688 McNeil C. L., C. L. Bain, and S. J. Macdonald, 2011 Multiple Quantitative Trait Loci Influence  
689 the Shape of a Male-Specific Genital Structure in *Drosophila melanogaster*. *G3* 1: 343–351.

690 Moreno E., and G. Morata, 1999 Caudal is the Hox gene that specifies the most posterior  
691 Drosophile segment. *Nature* 400: 873–877.

692 Nagy O., I. Nuez, R. Savisaar, A. E. Peluffo, A. Yassin, *et al.*, 2018 Correlated Evolution of Two  
693 Copulatory Organs via a Single cis-Regulatory Nucleotide Change. *Curr. Biol.* 28: 3450–  
694 3457.e13.

695 Narasimha M., A. Uv, A. Krejci, N. H. Brown, and S. J. Bray, 2008 Grainy head promotes  
696 expression of septate junction proteins and influences epithelial morphogenesis. *J. Cell Sci.*  
697 121: 747–752.

698 Neumann M., and M. Affolter, 2006 Remodelling epithelial tubes through cell rearrangements:  
699 from cells to molecules. *EMBO Rep.* 7: 36–40.

700 Noon E. P.-B., G. Sabarís, D. M. Ortiz, J. Sager, A. Liebowitz, *et al.*, 2018 Comprehensive  
701 Analysis of a cis-Regulatory Region Reveals Pleiotropy in Enhancer Function. *Cell Rep.* 22:  
702 3021–3031.

703 Nüsslein-Volhard C., and E. Wieschaus, 1980 Mutations affecting segment number and polarity  
704 in *Drosophila*. *Nature* 287: 795–801.

705 Okada T., 1954 Comparative morphology of the *Drosophilid* flies. Phallic organs of the  
706 melanogaster group. *Kontyu* 22: 36–46.

707 Olesnický E. C., A. E. Brent, L. Tonnes, M. Walker, M. A. Pultz, *et al.*, 2006 A caudal mRNA  
708 gradient controls posterior development in the wasp *Nasonia*. *Development* 133: 3973–  
709 3982.

710 Peluffo A. E., I. Nuez, V. Debat, R. Savisaar, D. L. Stern, *et al.*, 2015 A Major Locus Controls a  
711 Genital Shape Difference Involved in Reproductive Isolation Between *Drosophila yakuba*  
712 and *Drosophila santomea*. *G3* 5: 2893–2901.

713 Pfreundt U., D. P. James, S. Tweedie, D. Wilson, S. A. Teichmann, *et al.*, 2010 FlyTF: improved  
714 annotation and enhanced functionality of the *Drosophila* transcription factor database.  
715 *Nucleic Acids Res.* 38: D443–7.

716 Pisarev A., E. Poustelnikova, M. Samsonova, and J. Reinitz, 2009 FlyEx, the quantitative atlas  
717 on segmentation gene expression at cellular resolution. *Nucleic Acids Res.* 37: D560–6.

718 Polak M., and A. Rashed, 2010 Microscale laser surgery reveals adaptive function of male  
719 intromittent genitalia. *Proc. Biol. Sci.* 277: 1371–1376.

720 Quinlan A. R., and I. M. Hall, 2010 BEDTools: a flexible suite of utilities for comparing genomic  
721 features. *Bioinformatics* 26: 841–842.

722 Rafiqi A. M., S. Lemke, S. Ferguson, M. Stauber, and U. Schmidt-Ott, 2008 Evolutionary origin  
723 of the amnioserosa in cyclorrhaphan flies correlates with spatial and temporal expression

724 changes of zen. *Proc. Natl. Acad. Sci. U. S. A.* 105: 234–239.

725 Rebeiz M., N. H. Patel, and V. F. Hinman, 2015 Unraveling the Tangled Skein: The Evolution of  
726 Transcriptional Regulatory Networks in Development. *Annu. Rev. Genomics Hum. Genet.*  
727 16: 103–131.

728 Rice G., O. Barmina, D. Luecke, K. Hu, M. Arbeitman, *et al.*, 2019a Modular tissue-specific  
729 regulation of doublesex underpins sexually dimorphic development in *Drosophila*. *bioRxiv*  
730 585158.

731 Rice G., J. David, Y. Kamimura, J. Masly, A. Mcgregor, *et al.*, 2019b A Standardized  
732 Nomenclature and Atlas of the Male Terminalia of *Drosophila melanogaster*. Preprints.

733 Rivera-Pomar R., X. Lu, N. Perrimon, H. Taubert, and H. Jäckle, 1995 Activation of posterior  
734 gap gene expression in the *Drosophila* blastoderm. *Nature* 376: 253–256.

735 Russell S. R., N. Sánchez-Soriano, C. R. Wright, and M. Ashburner, 1996 The Dichaete gene of  
736 *Drosophila melanogaster* encodes a SOX-domain protein required for embryonic  
737 segmentation. *Development* 122: 3669–3676.

738 Sabarís G., I. Laiker, E. P.-B. Noon, and N. Frankel, 2019 Actors with Multiple Roles: Pleiotropic  
739 Enhancers and the Paradigm of Enhancer Modularity. *Trends Genet.* 0.  
740 <https://doi.org/10.1016/j.tig.2019.03.006>

741 Simmons L. W., 2014 Sexual selection and genital evolution. *Austral Entomology* 53: 1–17.

742 Small S., A. Blair, and M. Levine, 1996 Regulation of two pair-rule stripes by a single enhancer  
743 in the *Drosophila* embryo. *Dev. Biol.* 175: 314–324.

744 Smith S. J., M. Rebeiz, and L. Davidson, 2018 From pattern to process: studies at the interface  
745 of gene regulatory networks, morphogenesis, and evolution. *Curr. Opin. Genet. Dev.* 51:  
746 103–110.

747 Staller M. V., C. C. Fowlkes, M. D. J. Bragdon, Z. Wunderlich, J. Estrada, *et al.*, 2015 A gene  
748 expression atlas of a bicoid-depleted *Drosophila* embryo reveals early canalization of cell  
749 fate. *Development* 142: 587–596.

750 Takahara B., and K. H. Takahashi, 2015 Genome-Wide Association Study on Male Genital  
751 Shape and Size in *Drosophila melanogaster*. *PLoS One* 10: e0132846.

752 Takahashi K. H., M. Ishimori, and H. Iwata, 2018 HSP90 as a global genetic modifier for male  
753 genital morphology in *Drosophila melanogaster*. *Evolution* 72: 2419–2434.

754 Tanaka K. M., C. Hopfen, M. R. Herbert, C. Schlotterer, D. L. Stern, *et al.*, 2015 Genetic  
755 Architecture and Functional Characterization of Genes Underlying the Rapid Diversification  
756 of Male External Genitalia Between *Drosophila simulans* and *Drosophila mauritiana*.  
757 *Genetics* 200: 357–369.

- 758 Tanaka K. M., Y. Kamimura, and A. Takahashi, 2018 Mechanical incompatibility caused by  
759 modifications of multiple male genital structures using genomic introgression in drosophila.  
760 Evolution. <https://doi.org/10.1111/evo.13592>
- 761 Tomancak P., B. P. Berman, A. Beaton, R. Weiszmann, E. Kwan, *et al.*, 2007 Global analysis of  
762 patterns of gene expression during Drosophila embryogenesis. Genome Biol. 8: R145.
- 763 Trapnell C., L. Pachter, and S. L. Salzberg, 2009 TopHat: discovering splice junctions with  
764 RNA-Seq. Bioinformatics 25: 1105–1111.
- 765 True J. R., J. Liu, L. F. Stam, Z.-B. Zeng, and C. C. Laurie, 1997 Quantitative Genetic Analysis  
766 of Divergence in Male Secondary Sexual Traits Between Drosophila simulans and  
767 Drosophila mauritiana. Evolution 51: 816–832.
- 768 Vincent B. J., M. V. Staller, F. Lopez-Rivera, M. D. J. Bragdon, E. C. G. Pym, *et al.*, 2018  
769 Hunchback is counter-repressed to regulate even-skipped stripe 2 expression in Drosophila  
770 embryos. PLoS Genet. 14: e1007644.
- 771 Whiteley M., P. D. Noguchi, S. M. Sensabaugh, W. F. Odenwald, and J. A. Kassis, 1992 The  
772 Drosophila gene escargot encodes a zinc finger motif found in snail-related genes. Mech.  
773 Dev. 36: 117–127.
- 774 Wieschaus E., and C. Nüsslein-Volhard, 2016 The Heidelberg Screen for Pattern Mutants of  
775 Drosophila: A Personal Account. Annu. Rev. Cell Dev. Biol. 32: 1–46.
- 776 Wotton K. R., E. Jiménez-Guri, A. Crombach, H. Janssens, A. Alcaine-Colet, *et al.*, 2015  
777 Quantitative system drift compensates for altered maternal inputs to the gap gene network  
778 of the scuttle fly Megaselia abdita. Elife 4. <https://doi.org/10.7554/eLife.04785>
- 779 Wunderlich Z., M. D. Bragdon, K. B. Eckenrode, T. Lydiard-Martin, S. Pearl-Waserman, *et al.*,  
780 2012 Dissecting sources of quantitative gene expression pattern divergence between  
781 Drosophila species. Mol. Syst. Biol. 8: 604.
- 782 Wunderlich Z., C. C. Fowlkes, K. B. Eckenrode, M. D. J. Bragdon, A. Abiri, *et al.*, 2019  
783 Quantitative Comparison of the Anterior-Posterior Patterning System in the Embryos of  
784 Five Drosophila Species. G3 . <https://doi.org/10.1534/g3.118.200953>
- 785 Yassin A., and V. Orgogozo, 2013 Coevolution between male and female genitalia in the  
786 Drosophila melanogaster species subgroup. PLoS One 8: e57158.
- 787 Yassin A., and J. R. David, 2016 Within-species reproductive costs affect the asymmetry of  
788 satyriazation in Drosophila. J. Evol. Biol. 29: 455–460.
- 789 Zeng Z. B., J. Liu, L. F. Stam, C. H. Kao, J. M. Mercer, *et al.*, 2000 Genetic architecture of a  
790 morphological shape difference between two Drosophila species. Genetics 154: 299–310.
